CORRECTION

# Correction: Alteration of urinary neutrophil gelatinase-associated lipocalin as a predictor of tacrolimus-induced chronic renal allograft fibrosis in tacrolimus dose adjustments following kidney transplantation

The *PLOS ONE* Staff

The first two authors, Wiwat Chanchaoenthana and Asada Leelahavanichkul, should be noted as equal co-corresponding authors.

There is an error in the Funding statement. The correct Funding statement is as follows: All of the funding supports during study period including the Development of New Faculty Staff fund and Ratchadapiseksomphot Endowment Fund 2017 (76001-HR), Faculty of Medicine, Chulalongkorn University and National Science and Technology Development Agency (NSTDA: P-13-00505)–Dr. Asada Leelahavanichkul. A.L. is under Center of Excellence in Immunology and Immune Mediated Diseases group. The funders had no role in study design, data collection and analysis, decision to publish, or preparation of the manuscript.

The publisher apologizes for the errors.

## Reference

1. Chanchaoenthana W, Leelahavanichkul A, Wattanatorn S, Avihingsanon Y, Praditpornsilpa K, Eiam-Ong S, et al. (2018) Alteration of urinary neutrophil gelatinase-associated lipocalin as a predictor of tacrolimus-induced chronic renal allograft fibrosis in tacrolimus dose adjustments following kidney transplantation. *PLoS ONE* 13(12): e0209708. <https://doi.org/10.1371/journal.pone.0209708> PMID: 30576367

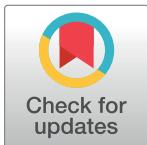

## OPEN ACCESS

**Citation:** The *PLOS ONE* Staff (2019) Correction: Alteration of urinary neutrophil gelatinase-associated lipocalin as a predictor of tacrolimus-induced chronic renal allograft fibrosis in tacrolimus dose adjustments following kidney transplantation. *PLoS ONE* 14(2): e0213009. <https://doi.org/10.1371/journal.pone.0213009>

**Published:** February 22, 2019

**Copyright:** © 2019 The PLOS ONE Staff. This is an open access article distributed under the terms of the [Creative Commons Attribution License](https://creativecommons.org/licenses/by/4.0/), which permits unrestricted use, distribution, and reproduction in any medium, provided the original author and source are credited.
